# Supplementary material for: Integration of a semi-rigid proline ligand and 4,4′-bipyridine in the synthesis of homochiral metal–organic frameworks with helices
Source: Royal Society of Chemistry journal article supplement (doi:10.1039/c5dt01151e), 2015-01-01
Supplement: c5dt01151e1.pdf [file c5dt01151e1.pdf]

*Electronic Supplementary Information (ESI) for*

**Integration of Semi-rigid proline ligand and 4,4'-bipyridine  
on the Synthesis of Homochiral metal-organic frameworks  
with helices**

Zhong-Xuan Xu,<sup>a,c</sup> Yao Kang,<sup>a</sup> Min-Le Han,<sup>b</sup> Dong-Sheng Li,<sup>b</sup> and Jian Zhang<sup>\*a,b</sup>

<sup>a</sup>State Key Laboratory of Structural Chemistry, Fujian Institute of Research on the  
Structure of Matter, the Chinese Academy of Sciences, Fuzhou, Fujian 350002, P. R. China.

<sup>b</sup>College of Materials & Chemical Engineering, China Three Gorges University, Yichang 443002,  
P. R. China.

<sup>c</sup>Department of Chemistry, Zunyi Normal College, Zunyi, Guizhou 563002, P. R. China

E-mail: [zhj@fjirsm.ac.cn](mailto:zhj@fjirsm.ac.cn)

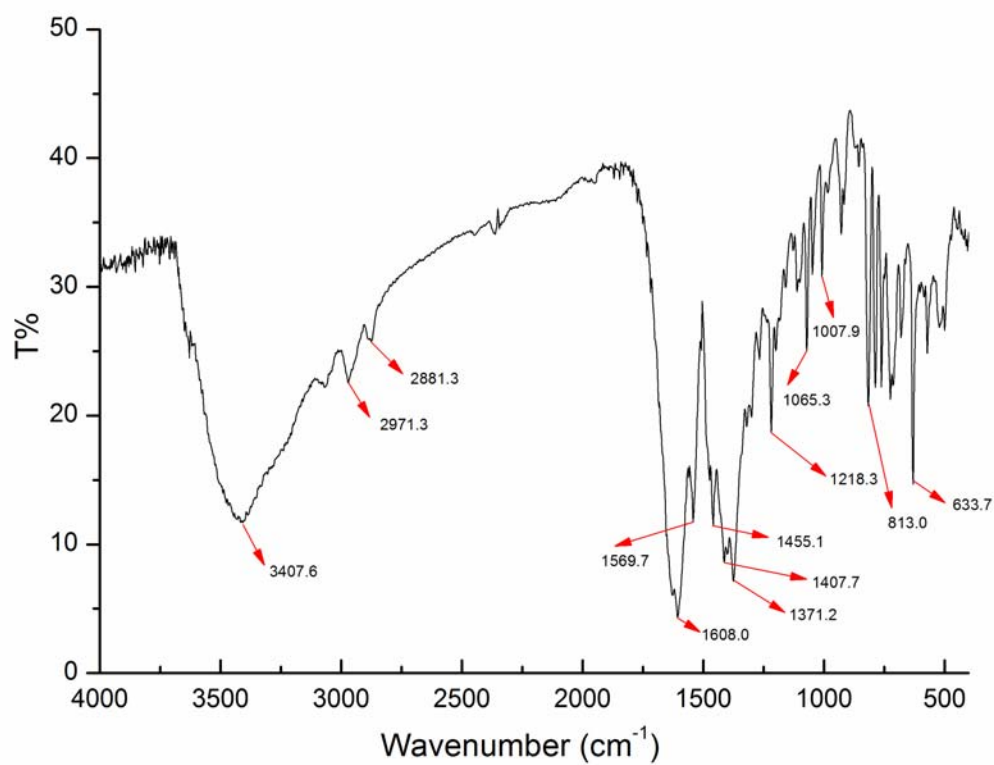

**Figure S1.** The IR spectra of **1-D**

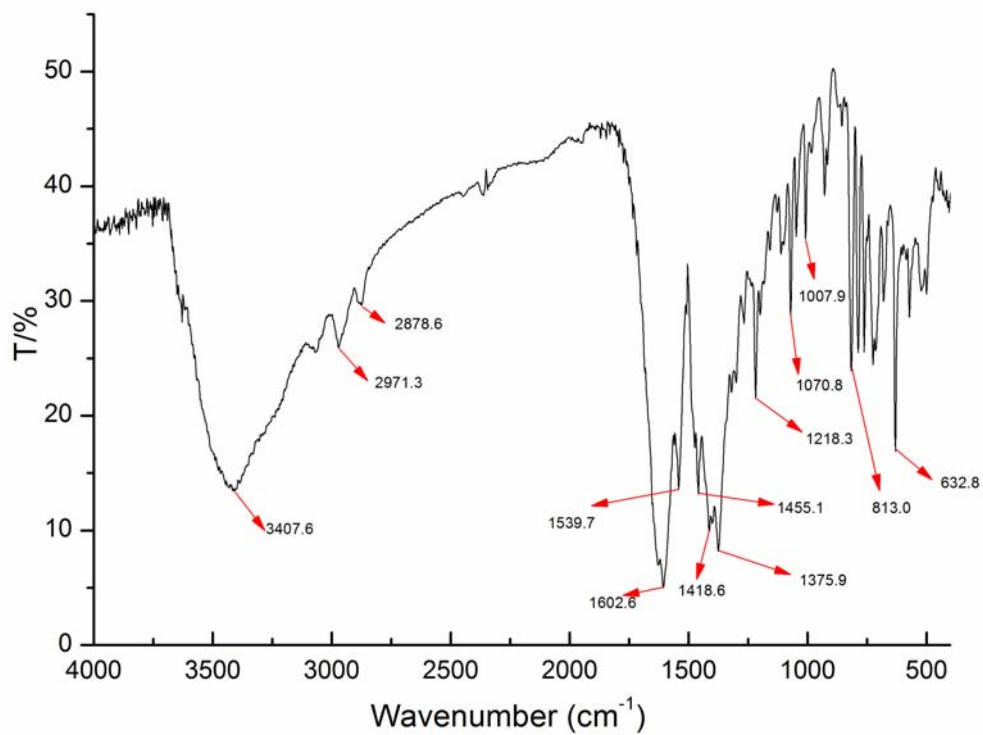

**Figure S2** The IR spectra of **1-L**

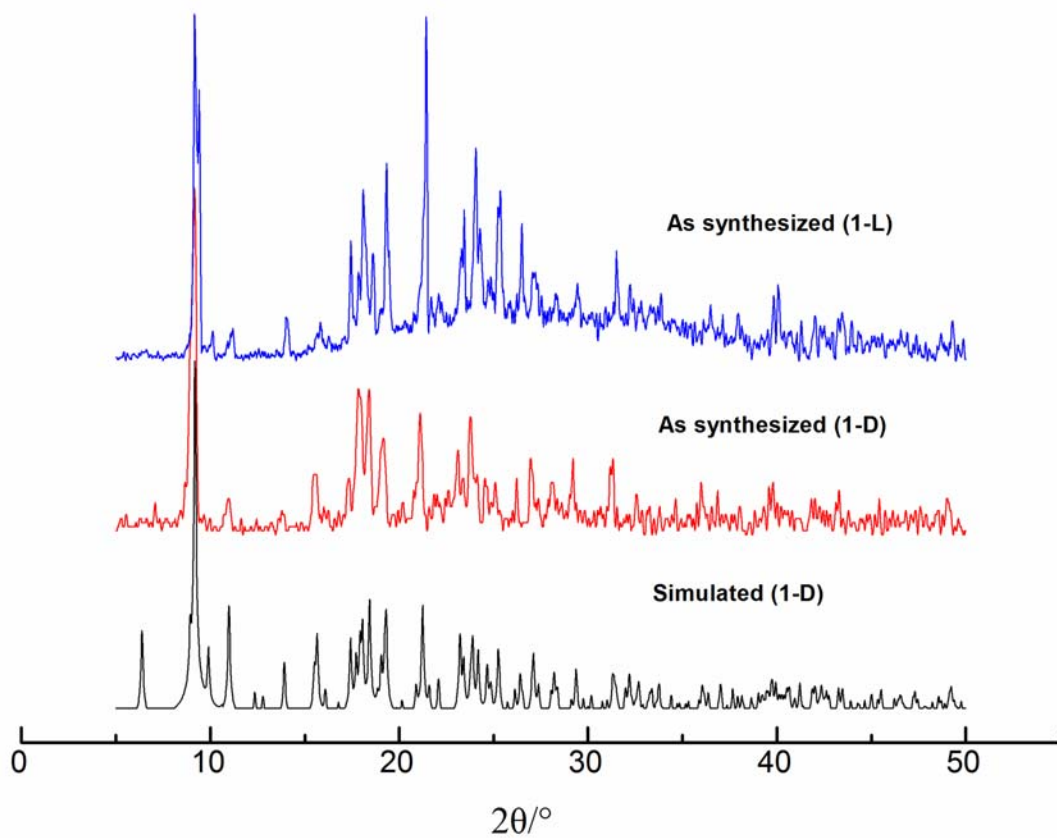

**Figure S3.** XRPD patterns of **1-D** and **1-L**

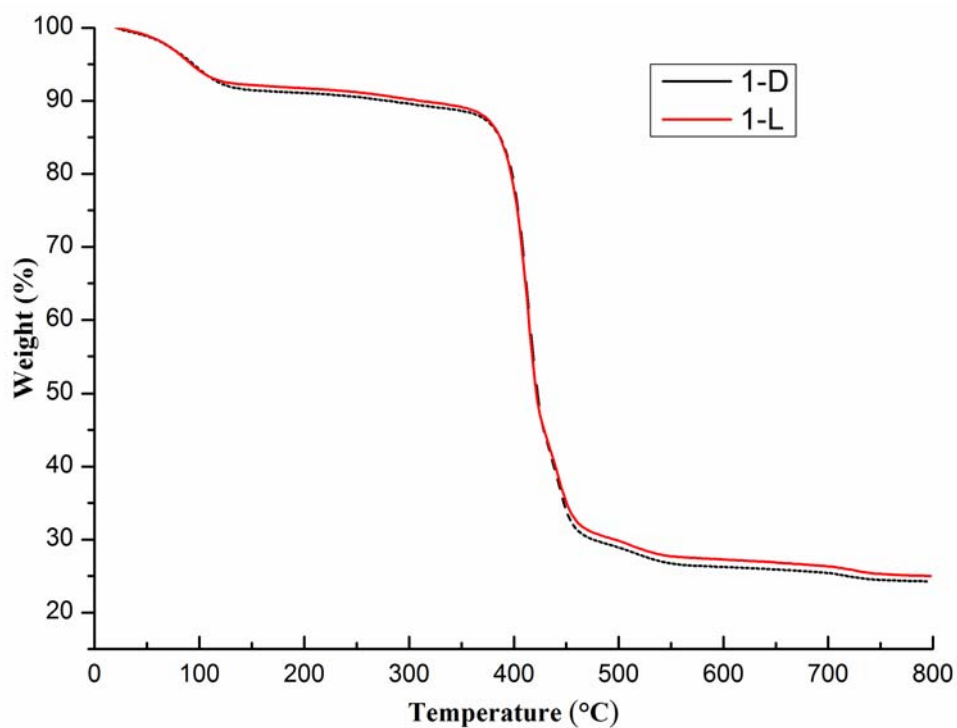

**Figure S4.** The TGA diagram of **1-D** and **1-L**

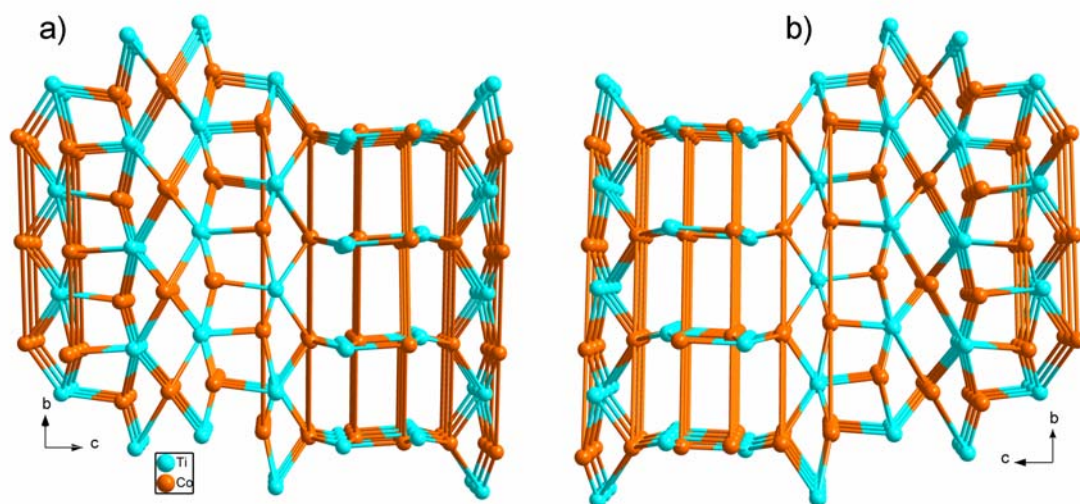

**Figure S5.** The topological net of **1-D** (a) and **1-L** (b)
